# Supplementary material for: Edible Xanthan/Propolis Coating and Its Effect on Physicochemical, Microbial, and Sensory Quality Indices in Mackerel Tuna (Euthynnus affinis) Fillets during Chilled Storage
Source: MDPI journal article supplement (doi:10.3390/gels8070405), 2022-06-25
Supplement: s1 [file s1]

## Article

# Edible Xanthan/Propolis Coating and Its Effect on Physicochemical, Microbial, and Sensory Quality Indices in Mackerel Tuna (*Euthynnus affinis*) Fillets during Chilled Storage

Aly Farag El Sheikha <sup>1,2,3,4,5,\*†</sup>, Ayman Younes Allam <sup>5,†</sup>, Emel Oz <sup>6</sup>, Muhammad Rizwan Khan <sup>7</sup>, Charalampos Proestos <sup>8,\*</sup> and Fatih Oz <sup>6</sup>

<sup>1</sup> College of Bioscience and Bioengineering, Jiangxi Agricultural University, 1101 Zhimin Road, Nanchang 330045, China

<sup>2</sup> School of Nutrition Sciences, Faculty of Health Sciences, University of Ottawa, 25 University Private, Ottawa, ON K1N 6N5, Canada

<sup>3</sup> Bioengineering and Technological Research Centre for Edible and Medicinal Fungi, Jiangxi Agricultural University, 1101 Zhimin Road, Nanchang 330045, China

<sup>4</sup> Jiangxi Key Laboratory for Conservation and Utilization of Fungal Resources, Jiangxi Agricultural University, 1101 Zhimin Road, Nanchang 330045, China

<sup>5</sup> Department of Food Science and Technology, Faculty of Agriculture, Minufiya University, Shibin El Kom 32511, Egypt; ayman\_alam@yahoo.com

<sup>6</sup> Department of Food Engineering, Faculty of Agriculture, Ataturk University, Erzurum 25240, Turkey; emel.oz@atauni.edu.tr (E.O.); fatihoz@atauni.edu.tr (F.O.)

<sup>7</sup> Department of Chemistry, College of Science, King Saud University, Riyadh 11451, Saudi Arabia; mrkhan@ksu.edu.sa

<sup>8</sup> Laboratory of Food Chemistry, Department of Chemistry, School of Sciences, National and Kapodistrian University of Athens, 15772 Athens, Greece

\* Correspondence: elsheikha\_aly@yahoo.com (A.F.E.S.); harpro@chem.uoa.gr (C.P.)

† These authors are considered the first author.

## Supplementary Materials

**Table S1.** Effect of storage conditions (2 °C for 20 days) and treatments on sensory evaluation during storage of mackerel tuna fillets.<sup>1</sup>

| Sensory attribute     | Treatment <sup>2</sup> | Storage period (day) <sup>1</sup> |                |                |                |                | LSD  |
|-----------------------|------------------------|-----------------------------------|----------------|----------------|----------------|----------------|------|
|                       |                        | 0                                 | 5              | 10             | 15             | 20             |      |
| Odor                  | Control                | 9.6 ± 0.15 Aa                     | 6.9 ± 0.13 Bb  | 5.2 ± 0.11 Cc  | 3.5 ± 0.14 Dc  | 2.5 ± 0.14 Ec  | 0.78 |
|                       | XAN-EEP 0%             | 9.6 ± 0.12 Aa                     | 7.8 ± 0.13 Bb  | 6.2 ± 0.14 Cb  | 4.5 ± 0.13 Db  | 2.7 ± 0.15 Ec  | 0.67 |
|                       | XAN-EEP 1%             | 9.5 ± 0.09 Aa                     | 7.7 ± 0.15 Bb  | 6.4 ± 0.18 Cb  | 4.6 ± 0.11 Db  | 3.8 ± 0.22 Eb  | 0.38 |
|                       | XAN-EEP 2%             | 9.5 ± 0.15 Aa                     | 8.9 ± 0.12 Ba  | 7.6 ± 0.08 Ca  | 6.5 ± 0.5 Da   | 5.6 ± 0.25 Ea  | 0.35 |
|                       | LSD                    | 0.46                              | 0.12           | 0.44           | 0.21           | 0.44           | -    |
| Test                  | Control                | 9.50 ± 0.31 Aa                    | 7.21 ± 0.11 Bb | 5.53 ± 0.15 Cb | 4.11 ± 0.14Dd  | 2.4 ± 0.32 Dd  | 0.55 |
|                       | XAN-EEP 0%             | 9.49 ± 0.29 Aa                    | 8.18 ± 0.12 Ab | 6.25 ± 0.18 Bb | 5.15 ± 0.12 Cc | 3.84 ± 0.29 Dc | 0.90 |
|                       | XAN-EEP 1%             | 9.49 ± 0.25 Aa                    | 8.61 ± 0.15 Aa | 6.56 ± 0.22 Bb | 5.81 ± 0.15 Cb | 4.42 ± 0.28 Db | 0.83 |
|                       | XAN-EEP 2%             | 9.50 ± 0.24 Aa                    | 8.72 ± 0.24 Aa | 7.84 ± 0.17 Ba | 6.72 ± 0.19 Ca | 5.62 ± 0.22 Da | 0.54 |
|                       | LSD                    | 0.23                              | 0.30           | 0.42           | 0.22           | 0.41           | -    |
| Overall acceptability | Control                | 9.1 ± 0.35 Aa                     | 6.3 ± 0.31 Bc  | 5.0 ± 0.25 Cc  | 3.2 ± 0.33 Dc  | 2.00 ± 0.29 Ec | 1.08 |
|                       | XAN-EEP 0%             | 9.2 ± 0.32 Aa                     | 7.5 ± 0.34 Bb  | 6.11 ± 0.26 Cb | 4.2 ± 0.41 Db  | 2.2 ± 0.32 Ec  | 1.11 |
|                       | XAN-EEP 1%             | 9.2 ± 0.39 Aa                     | 7.6 ± 0.29 Bb  | 6.13 ± 0.22 Cb | 4.1 ± 0.38 Db  | 3.2 ± 0.41 Eb  | 1.21 |
|                       | XAN-EEP 2%             | 9.2 ± 0.36 Aa                     | 8.3 ± 0.36 Ba  | 7.2 ± 0.28 Ca  | 6.0 ± 0.39 Da  | 4.5 ± 0.40 Ea  | 1.30 |
|                       | LSD                    | 0.22                              | 0.23           | 0.28           | 0.19           | 0.35           | -    |

<sup>1</sup> Results are expressed as Means ± standard deviation (SD). Values with different alphabetical letters (small letters, a to d) within columns differ significantly ( $P < 0.05$ ) as “effect of treatment”. Values with different alphabetical letters (capital letters, A to E) within rows differ significantly ( $P < 0.05$ ) as “effect of storage period”. All the readings were taken in triplicates.

<sup>2</sup> Treatment: Control: Uncoated mackerel tuna fillet samples; XAN-EEP 0%: Coated samples with xanthan containing (0%) ethanolic extract of propolis; XAN-EEP 1%: Coated sample with xanthan containing (1%) ethanolic extract of propolis; XAN-EEP 2%: Coated sample with xanthan containing (2%) ethanolic extract of propolis.
